# Supplementary material
Source: Research Square preprint supplement (doi:10.21203/rs.3.rs-9114122/v1)
Supplement: Supplementary file 7 [file cea42f4677be2329ebd30fad.docx]

Online Resource 1: Annual crude and age-standardised suicide mortality rates by sex

Online Resource 2: Age-specific suicide mortality rates by period and sex

Online Resource 3: Complete age–period–cohort model coefficients

Online Resource 4: Provincial disparities in suicide mortality

Online Resource 5: Male-to-female suicide mortality ratio and the gender paradox

Online Resource 6: Sensitivity and robustness analyses for the APC model

Online Resource 7: Sensitivity analyses for counterfactual estimation of pandemic excess mortality

Online Resource 8: Age-specific trends and pandemic-period rate ratios

Online Resource 9: Additional descriptive figures
